# Supplementary material
Source: PubMed Central journal article supplement (PMC6319961)
Supplement: NIHMS1515500-supplement-2.pdf [file NIHMS1515500-supplement-2.pdf]

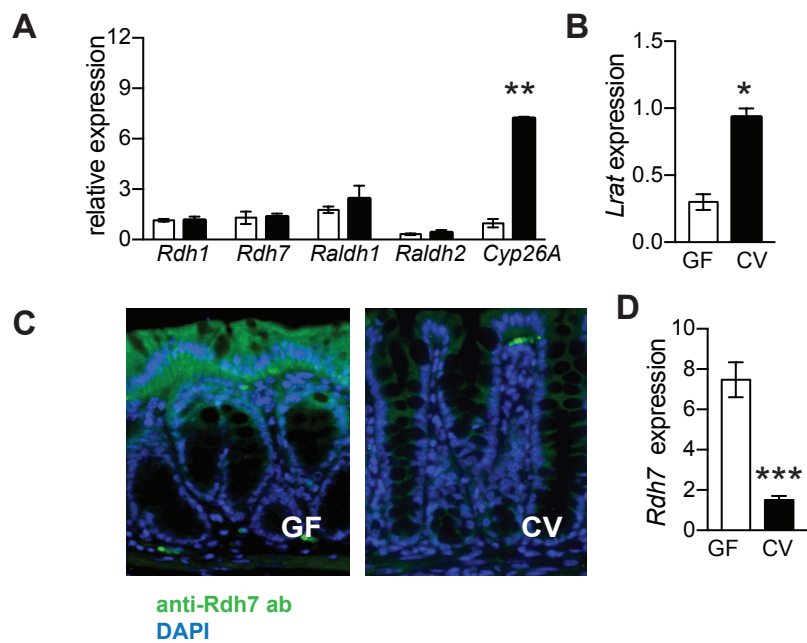

Figure S1. Bacterial regulation of *Rdh7* expression in liver and colon. Related to Figure 2

(A) mRNA quantification of genes involved in Vitamin A metabolism in liver of conventional (CV) and germ-free (GF). (B) mRNA quantification of *Lrat* in liver tissue of conventional (CV) and germ-free (GF). Anti-Rdh7 staining of colon tissues of conventional (CV) and germ-free (GF) mice. qPCR analysis of *Rdh7* mRNA in colon tissues of conventional (CV) and germ-free (GF) mice.

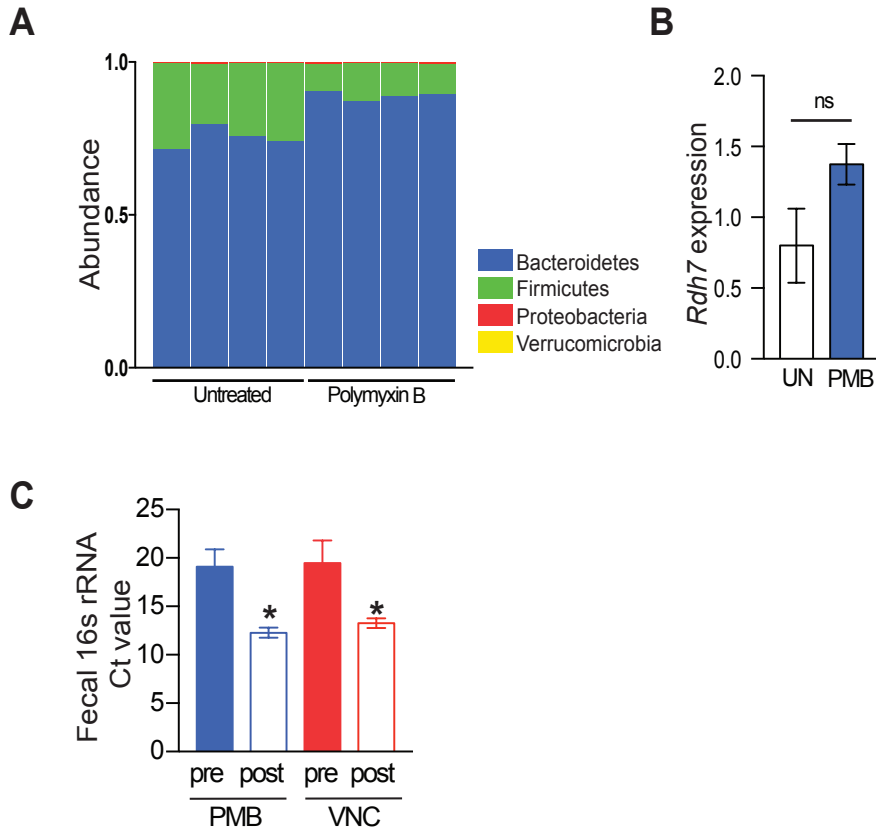

Figure S2. Effect of antibiotics on gut microbiota and *Rdh7* expression. Related to Figure 3

(A) Relative abundance of bacteria at phylum level determined by 16s rRNA analysis of fecal microbiome from untreated and polymyxin B treated mice. Mice were treated with polymyxin B (1000mg/L) in drinking water for four weeks. (B) *Rdh7* mRNA quantification by qPCR in colon tissue mice treated with untreated versus polymyxin B treated mice. (C) 16s qPCR to look at bacteria numbers in mice treated with vancomycin and polymyxin B. Figures A-C are representative figures of a single experiment that was done 3 individual times. Student's t-test. Error bars represent SEM. \* $P < 0.05$ .

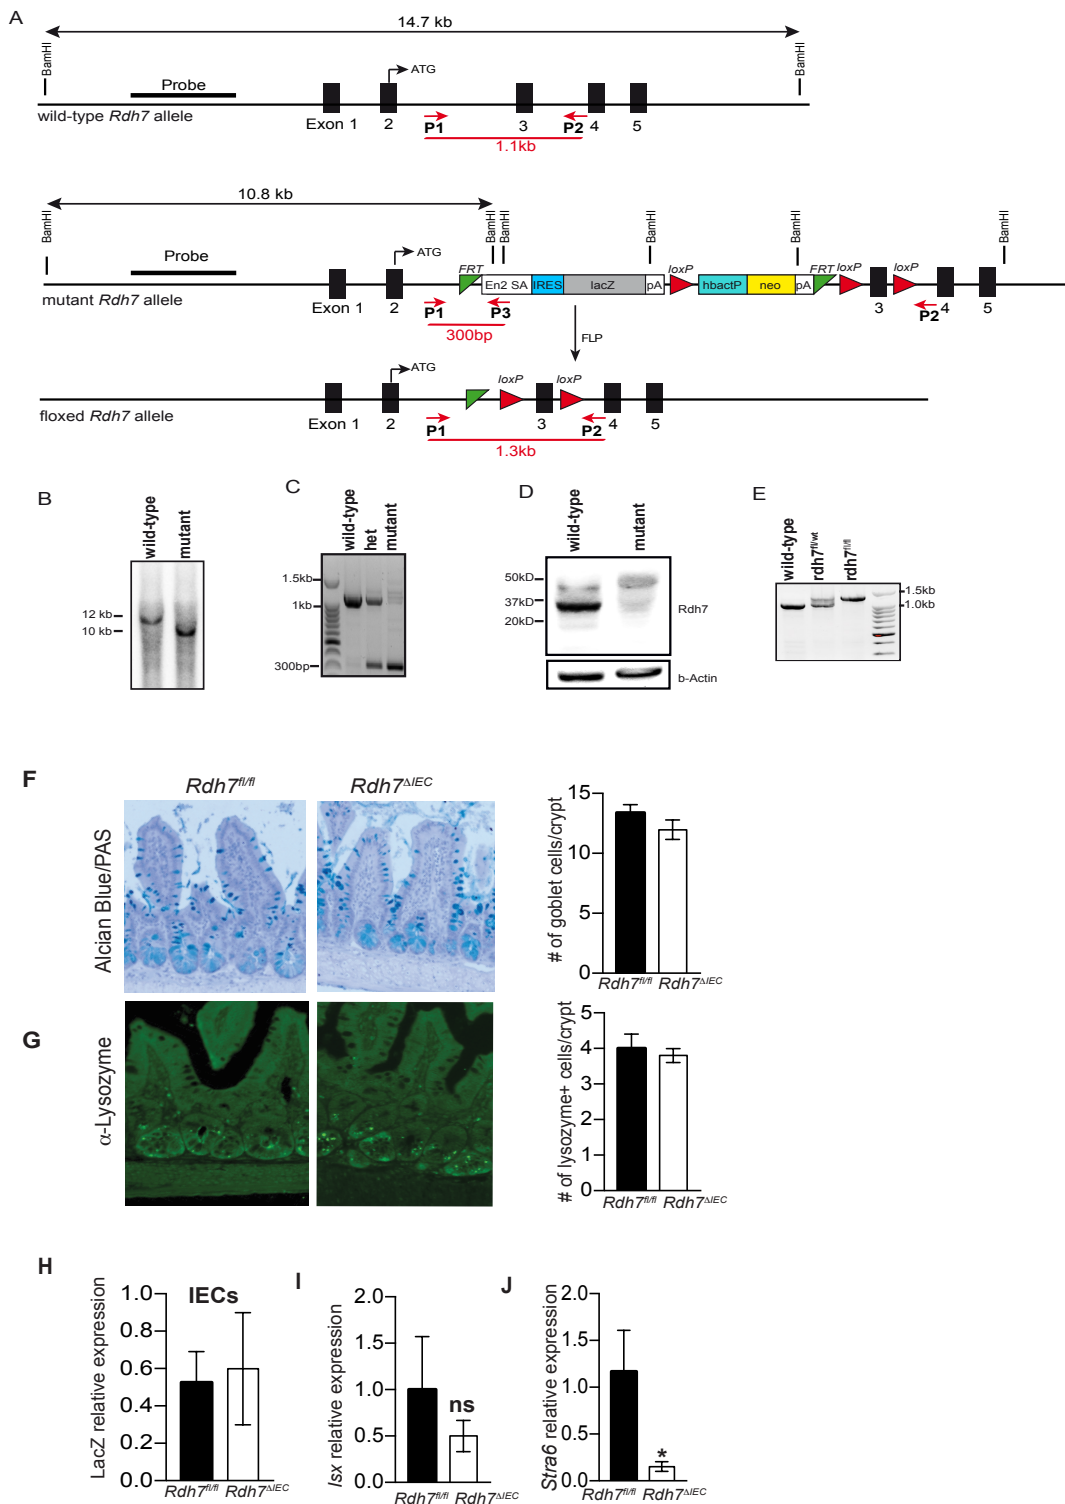

Figure S3. Generation and validation of *Rdh7<sup>fl/fl</sup>* and *Rdh7<sup>ΔIEC</sup>* mouse models. Related to Figure 4

(A) Scheme for generation of *Rdh7<sup>fl/fl</sup>* and *Rdh7<sup>ΔIEC</sup>* mouse models (B) Southern Blot confirming correct insertion of trapping vector. (C) PCR results confirming correct insertion. (D) Western Blot results testing for *Rdh7* in *Rdh7<sup>fl/fl</sup>* and *Rdh7<sup>ΔIEC</sup>*. (E) Genotyping results for *Rdh7<sup>fl/fl</sup>* and *Rdh7<sup>ΔIEC</sup>*. (F) Alcian Blue staining in paraffin embedded colon tissue to look at goblet cell numbers in *Rdh7<sup>fl/fl</sup>* and *Rdh7<sup>ΔIEC</sup>* mice. Graph on the side shows quantification of goblet cells from Alcian Blue staining. (G) Lysozyme staining in paraffin embedded colon tissue to look at Paneth cell numbers in *Rdh7<sup>fl/fl</sup>* and *Rdh7<sup>ΔIEC</sup>* mice. Graph on the side shows quantification of Paneth cells from Lysozyme staining. (H) *LacZ* mRNA quantification in intestinal epithelial cells (IECs) from *Rdh7<sup>fl/fl</sup>* and *Rdh7<sup>ΔIEC</sup>* (I) *Isx* mRNA quantification in intestinal tissue from *Rdh7<sup>fl/fl</sup>* and *Rdh7<sup>ΔIEC</sup>*. (J) *Stra6* mRNA quantification in intestinal tissue from *Rdh7<sup>fl/fl</sup>* and *Rdh7<sup>ΔIEC</sup>*. For figures F, G, H-J Student's t-test was performed, Error bars represent SEM. \**P* < .05.

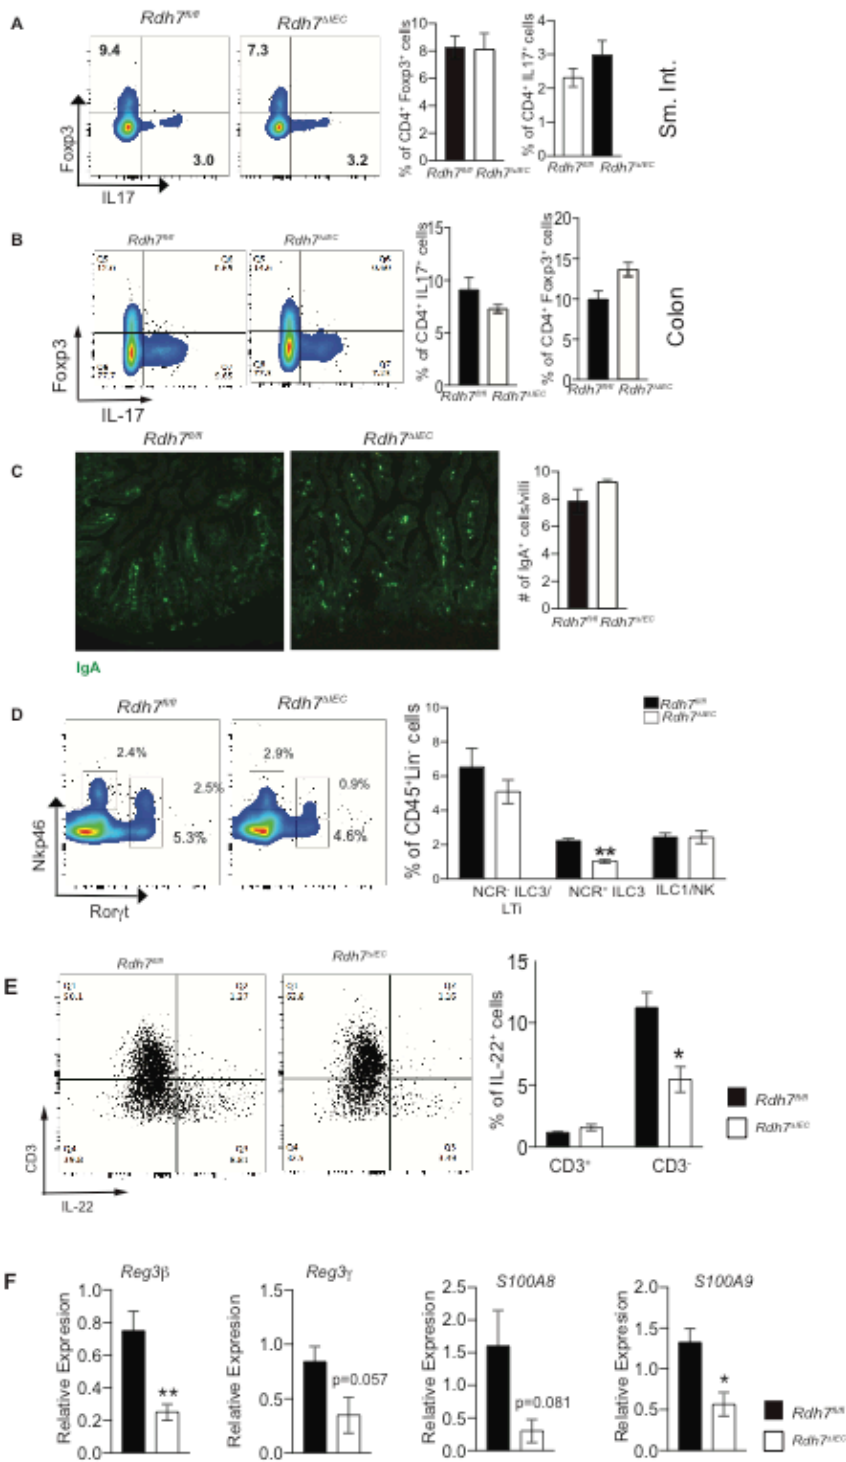

Figure S4. Analysis of gut T and B lymphocytes in *Rdh7<sup>fl/fl</sup>* and *Rdh7<sup>ΔIEC</sup>* mouse models. Related to Figure 5.

(A) Representative flow cytometry plots showing frequency CD45<sup>+</sup>CD4<sup>+</sup> cells. Bar plots show frequencies of T-reg and Th17 cells in the small intestine lamina propria. (B) Representative flow cytometry plots showing frequency CD45<sup>+</sup>CD4<sup>+</sup> cells. Bar plots show frequencies of T-reg and Th17 cells in the colon lamina propria. (C) Immunofluorescent looking at IgA positive cells (green), followed by quantification of IgA<sup>+</sup> cells per villi. (D) Representative plots showing live CD45<sup>+</sup>Lin<sup>-</sup>(CD3<sup>-</sup>CD19<sup>-</sup>CD11b<sup>-</sup>Gr1<sup>-</sup>Ly76<sup>-</sup>) lamina propria lymphocytes and bar plot showing frequencies of Lin<sup>-</sup>RORγt<sup>+</sup>NKp46<sup>-</sup> (NCR<sup>-</sup>ILC3/LTi), of Lin<sup>-</sup>RORγt<sup>+</sup>NKp46<sup>+</sup> (NCR<sup>+</sup>ILC3s) and of Lin<sup>-</sup>RORγt<sup>+</sup>NKp46<sup>+</sup> (ILC1/NK) lymphocytes. (E) Frequencies of CD3<sup>+</sup>IL-22<sup>+</sup> and CD3<sup>-</sup>IL-22<sup>+</sup> lymphocyte populations in colon of *Rdh7<sup>fl/fl</sup>* and *Rdh7<sup>ΔIEC</sup>* littermate mice. mRNA quantification of antimicrobials peptides in the intestine controlled by IL-22. (N=4 per group). Student's t-test; Error bars represent SEM. \**P* < 0.05, \*\**P* < 0.01 and \*\*\**P* < 0.00



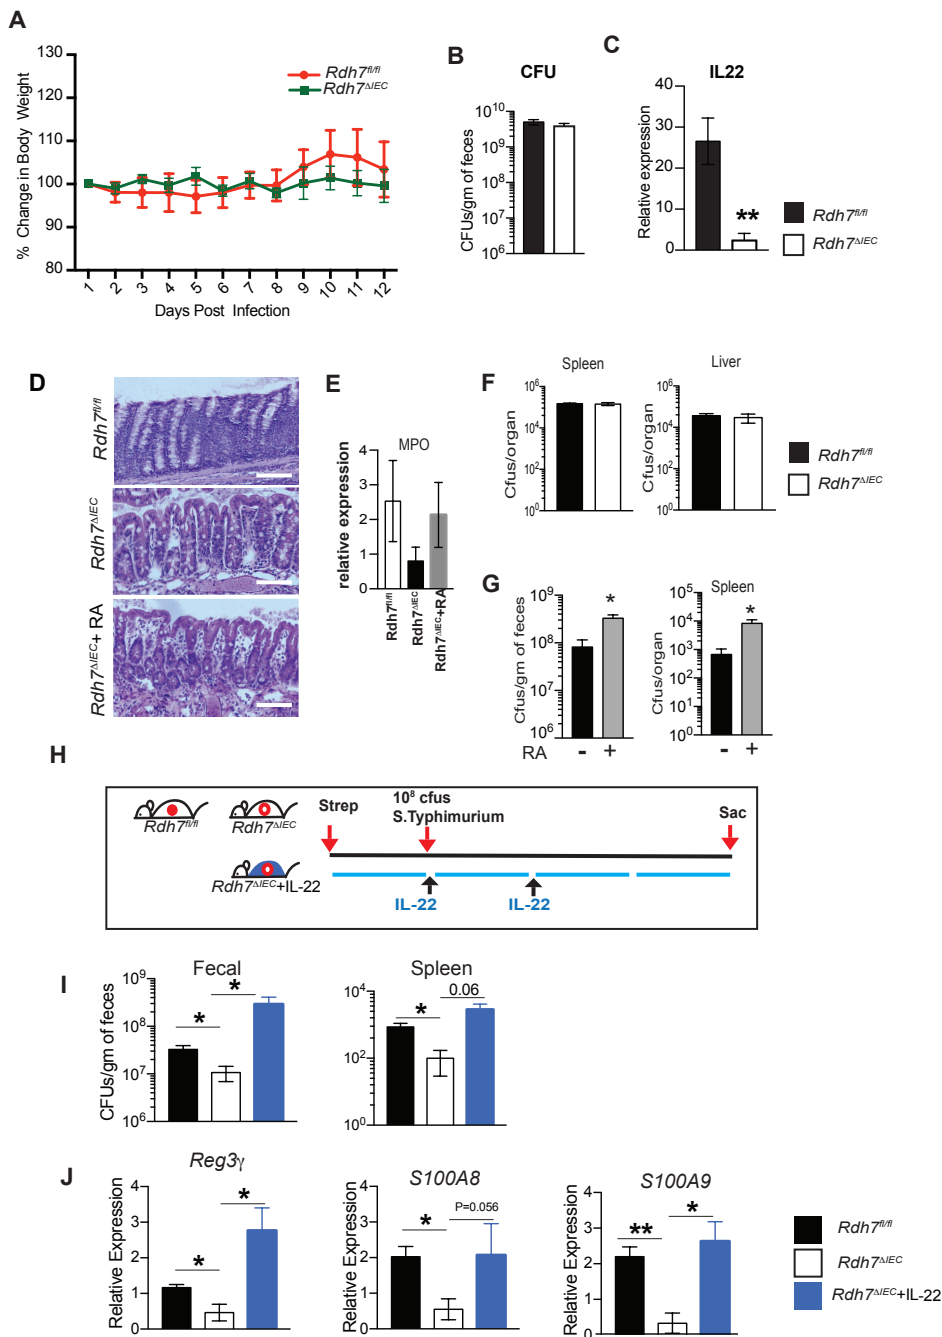

Figure S5. Role of IL-22 and RA in making *Rdh7<sup>fl/fl</sup>* and *Rdh7<sup>ΔIEC</sup>* mice susceptible to enteric pathogens. Related to Figure 6.

(A) Change in body weight percentage in mice that were orally given  $2 \times 10^9$  CFU of *C. rodentium* and sacrificed 12 days post infection. Body weight was taken and recorded daily. (B) Colony forming units/mL (CFU/mL) were determined on the last day of the experiment. (C) Quantification of *Il-22* mRNA in colonic tissue. (D) H&E stained colon sections of *Rdh7<sup>fl/fl</sup>* and *Rdh7<sup>ΔIEC</sup>* and *Rdh7<sup>ΔIEC</sup>+RA* during *Salmonella* infection. These images are at 10x magnification. (E) *Mpo* mRNA expression to look at neutrophil activity. (F) Quantification of bacterial burden in spleen and liver from systemic *S. Typhimurium* (Given intraperitoneally) in *Rdh7<sup>fl/fl</sup>*, *Rdh7<sup>ΔIEC</sup>* mice at 24 hours post infection. (G) Quantification of *S. Typhimurium* bacterial burden in feces from streptomycin treated C57 wild-type and C57 wild-type +RA mice at 72 hours post infection. (H) Diagram illustrating *S. Typhimurium* infection and IL-22 treatment timeline. (I) Quantification of *S. Typhimurium* bacterial burden in fecal content and spleen from streptomycin treated *Rdh7<sup>fl/fl</sup>*, *Rdh7<sup>ΔIEC</sup>* and *Rdh7<sup>ΔIEC</sup>+IL-22* mice at 72 hours post infection. (J) mRNA quantification from colon tissue of IL-22 dependent antimicrobials, in the colon of *Rdh7<sup>fl/fl</sup>*, *Rdh7<sup>ΔIEC</sup>* and *Rdh7<sup>ΔIEC</sup>+IL-22* mice 72 hours post infection with *S. Typhimurium*. Representative data of a single experiment that were performed three times (N=4 per group). Student's test; Error bars represent SEM. \* $P < 0.05$ , \*\* $P < 0.01$ .

| retinoid        | mass  | DP, V | Q1, m/z | EP, V | CE, V | Q3, m/z | XP, V |
|-----------------|-------|-------|---------|-------|-------|---------|-------|
| atRA            | 300.2 | 80    | 301.2   | 10    | 17    | 205.1   | 10    |
| atRA-d5         | 305.2 | 80    | 306.2   | 10    | 17    | 208.1   | 10    |
| ROH             | 286.2 | 60    | 269.2   | 10    | 25    | 93      | 10    |
| ROH-d8          | 294.2 | 60    | 277.2   | 10    | 25    | 98      | 10    |
| RE palmitate    | 524.5 | 60    | 269.2   | 10    | 25    | 93      | 10    |
| RE palmitate-d4 | 528.5 | 60    | 273.2   | 10    | 25    | 94      | 10    |

**Supplemental Table 1** MS/MS parameters used for retinoid quantification. Related to figure 1.

CE- collision energy, DP, declustering potential, EP entrance potential, Q1 precursor ion, Q3 product ion, XP exit potential.

| Gene          | Forward                         | Reverse                          |
|---------------|---------------------------------|----------------------------------|
| <i>Rdh7</i>   | 5' GTGTCTTTGTGTGGTGGTGGTTAC 3'  | 5' CCACAGCTTCTCTATGCTGTGTGA 3'   |
| <i>Raldh1</i> | 5' GAATTCTGCCAAGGGATTCA 3'      | 5' GGGGTCAGAGGATTTCCAAGAACATA 3' |
| <i>Raldh2</i> | 5' AATCCAGCCACAGGAGAGCAAGTG 3'  | 5' CACGGTGTTACCACAGCACAATGC 3'   |
| <i>Cyp26A</i> | 5' GCACAAGCAGCGAAAGAAGGTGATT 3' | 5' GGAAGAGAGAAGAGATTGCGGGTCA 3'  |
| <i>Lrat</i>   | 5' AGTTCAAGACTAGCCTGCTCA 3'     | 5' TACAAGCTGGCCTTCGAC 3'         |
| <i>Reg3β</i>  | 5' TACTGCCTTAGACCGTGCTTTCTG 3'  | 5' GACATAGGGCAACTTCACCTCACA 3'   |
| <i>Reg3γ</i>  | 5' TTCCTGTCCTCCATGATCAAAA 3'    | 5' CATCCACCTCTGTTGGGTTCA 3'      |
| <i>S100a8</i> | 5' TGCCTCAGTTTGTGCAGAATATAAA 3' | 5' TCACCATCGCAAGGAACTCC 3'       |
| <i>S100a9</i> | 5' TGTCTCAGTTTGTGCAGAATATAAA 3' | 5' TCACCATCGCAAGGAACTCC 3'       |
| <i>LacZ</i>   | 5' GCGTGGATGAAGACCAGC 3'        | 5' CGAAGCCGCCCTGTAAAC 3'         |
| <i>Il-22</i>  | 5' TTGAGGTGTCCAACCTCCAGCA 3'    | 5' AGCCGGACGTCTGTGTTGTTA 3'      |
| <i>Gapdh</i>  | 5' AACTTTGGCATTGTGGAAGG 3'      | 5' ACACATTGGGGGTAGGAACA 3'       |
| <i>Isx</i>    | 5'TTCCACTTCACCCATTACCC 3'       | 5'CTCTTCTCCTGCTTCCTCCA 3'        |
| <i>18-s</i>   | 5' CATTCGAACGTCTGCCCTATC 3'     | 5' CCTGCTGCCTTCCTTGA 3'          |

**Supplemental Table 2** Primers Used for Quantitative PCR. Related to STAR Methods
